# Supplementary material
Source: MDPI journal article supplement (https://www.mdpi.com/2673-3293/2/2/16)
Supplement: s1 [file s1]

## Supplementary Information

### Electrolytic Reduction of Titanium Dioxide in Molten $\text{Li}_2\text{O}/\text{LiCl}$

Meng Shi<sup>1</sup>, Bin Liu<sup>2</sup>, Shelly Li<sup>3</sup>, Haiyan Zhao<sup>1\*</sup>

<sup>1</sup>University of Idaho, 995 MK Simpson. Idaho Falls, 83401, ID USA

<sup>2</sup>Kansas State University, Manhattan, 66506, KS USA

<sup>3</sup>Idaho National Laboratory, Idaho Falls, 83401, ID USA

\*Corresponding author. Tel.: +01 2085338123. E-mail: haiyanz@uidaho.edu (Haiyan Zhao)

#### Table of Contents

|                                                                 |   |
|-----------------------------------------------------------------|---|
| 1. Rietveld refinement of the soaked and reduced products ..... | 2 |
| 2. Density Functional Theory (DFT) simulations .....            | 5 |
| 2.1 Density Functional Theory .....                             | 5 |
| 2.2 Crystal models .....                                        | 5 |
| 2.3 Free energy calculations .....                              | 6 |
| References .....                                                | 8 |

### **1. Rietveld refinement of the soaked and reduced products**

The Rietveld refinement was carried out to quantify the phases in the samples after TiO<sub>2</sub> soaking test and for TiO<sub>2</sub> electrolytic reductions at various cathodic potentials (-0.2 V, -0.3 V and -0.4 V vs. Li/Li<sup>+</sup>) using 80%, 130% and 150% of theoretical charge. Multiple phases including TiO<sub>2</sub> (01-084-1284), Li<sub>2</sub>TiO<sub>3</sub> (01-080-7163), LiTiO<sub>2</sub> (01-074-2257) and Li<sub>0.54</sub>Ti<sub>2.86</sub>O<sub>6</sub> are used for the refinement. The background was fitted manually. The lattice parameters and scale factors of each species were refined, based on which the quantitative compositions (in wt.%) of the samples were obtained. The precision of the fitting in terms of the R values and the  $\chi^2$  are all within acceptable range. The fitting results and phase parameters are summarized in Table S1.

Table S1 Rietveld refinement results for the soaked and reduced products

| Samples *                                                                                            |                                                      | Soaked<br>Sample | 80%<br>–0.2 V | 80%<br>–0.3 V | 80%<br>–0.4 V | 130%<br>–0.3 V | 150%<br>–0.3 V |
|------------------------------------------------------------------------------------------------------|------------------------------------------------------|------------------|---------------|---------------|---------------|----------------|----------------|
| Products composition<br>(w.t. %)                                                                     | TiO <sub>2</sub>                                     | 60.8             | 14.54         | 1.69          | 4.05          | 0.00           | 0.00           |
|                                                                                                      | Li <sub>2</sub> TiO <sub>3</sub>                     | 38.0             | 35.66         | 28.27         | 26.22         | 13.36          | 0.00           |
|                                                                                                      | LiTiO <sub>2</sub>                                   | ---              | 49.80         | 70.04         | 69.73         | 86.64          | 100.00         |
|                                                                                                      | Li <sub>0.54</sub> Ti <sub>2.86</sub> O <sub>6</sub> | 1.2              | ---           | ---           | ---           | ---            | ---            |
| R factors                                                                                            | R <sub>wp</sub> (%)                                  | 15.98            | 6.93          | 6.06          | 6.99          | 6.33           | 6.42           |
|                                                                                                      | R <sub>p</sub> (%)                                   | 11.23            | 4.67          | 4.16          | 4.77          | 4.56           | 4.52           |
|                                                                                                      | R <sub>e</sub> (%)                                   | 5.57             | 5.73          | 5.51          | 5.51          | 5.58           | 5.47           |
|                                                                                                      | S                                                    | 2.8653           | 1.2054        | 1.0955        | 1.2644        | 1.1328         | 1.1721         |
|                                                                                                      | $\chi^2$                                             | 8.2101           | 1.453         | 1.2002        | 1.5986        | 1.2832         | 1.3737         |
|                                                                                                      | Maximum shift e.s.d.                                 | 0.339            | 0.682         | 0.359         | 0.075         | 0.366          | 0.002          |
| Phases                                                                                               |                                                      | Parameters       |               |               |               |                |                |
| TiO <sub>2</sub><br>Rutile, syn<br>(01-084-1284)<br>Space group:<br>136 : P42/mnm                    | a (Å)                                                | 4.544644         | 4.58666       | 4.58666       | 4.58666       | ---            | ---            |
|                                                                                                      | b (Å)                                                | 4.544644         | 4.58666       | 4.58666       | 4.58666       | ---            | ---            |
|                                                                                                      | c (Å)                                                | 2.927009         | 2.95407       | 2.95407       | 2.95407       | ---            | ---            |
|                                                                                                      | $\alpha$ (Degree)                                    | 90               | 90            | 90            | 90            | ---            | ---            |
|                                                                                                      | $\beta$ (Degree)                                     | 90               | 90            | 90            | 90            | ---            | ---            |
|                                                                                                      | $\gamma$ (Degree)                                    | 90               | 90            | 90            | 90            | ---            | ---            |
|                                                                                                      | V (Å <sup>3</sup> )                                  | 60.452834        | 62.146099     | 62.146099     | 62.146099     | ---            | ---            |
|                                                                                                      | Scale factor                                         | 68(2)            | 16.3(9)       | 3.2(14)       | 5.7(15)       | ---            | ---            |
|                                                                                                      | Gaussian peak<br>width<br>parameters (°)             | U                | 0.148(14)     | 0.16(2)       | 0.19(5)       | 0.09(4)        | ---            |
|                                                                                                      |                                                      | V                | –0.149(4)     | –0.16(3)      | –0.26(8)      | –0.157(11)     | ---            |
|                                                                                                      |                                                      | W                | 0.001(4)      | 0.011(7)      | 0.06(2)       | 0.051(4)       | ---            |
| LiTiO <sub>2</sub><br>Lithium titanium(III)<br>oxide<br>(01-074-2257)<br>Space group:<br>225 : Fm-3m | a (Å)                                                | ---              | 4.1372(4)     | 4.1457(5)     | 4.1355(2)     | 4.1400(5)      | 4.14000        |
|                                                                                                      | b (Å)                                                | ---              | 4.1372(4)     | 4.1457(5)     | 4.1355(2)     | 4.1400(5)      | 4.14000        |
|                                                                                                      | c (Å)                                                | ---              | 4.1372(4)     | 4.1457(5)     | 4.1355(2)     | 4.1400(5)      | 4.14000        |
|                                                                                                      | $\alpha$ (Degree)                                    | ---              | 90            | 90            | 90            | 90             | 90             |
|                                                                                                      | $\beta$ (Degree)                                     | ---              | 90            | 90            | 90            | 90             | 90             |
|                                                                                                      | $\gamma$ (Degree)                                    | ---              | 90            | 90            | 90            | 90             | 90             |

|                                                                                                                             |                                                  |   |           |            |            |            |            |           |
|-----------------------------------------------------------------------------------------------------------------------------|--------------------------------------------------|---|-----------|------------|------------|------------|------------|-----------|
|                                                                                                                             | V (Å <sup>3</sup> )                              |   | ---       | 70.813(11) | 71.254(15) | 70.729(7)  | 70.957(16) | 70.957937 |
|                                                                                                                             | Scale factor                                     |   | ---       | 32.8(15)   | 62.6(17)   | 54.8(17)   | 66.9(19)   | 62.7(17)  |
|                                                                                                                             | Gaussian peak width parameters (° <sup>2</sup> ) | U | ---       | 0.27(3)    | 0.24(6)    | 0.204(10)  | 0.20(4)    | 1.098(12) |
|                                                                                                                             |                                                  | V | ---       | -0.16(3)   | -0.26(8)   | -0.157(11) | -0.17(4)   | -1.00(15) |
|                                                                                                                             |                                                  | W | ---       | 0.011(7)   | 0.06(2)    | 0.051(4)   | 0.053(11)  | 0.248(2)  |
| Li <sub>2</sub> TiO <sub>3</sub><br>Dilithium titanate (IV)<br>(01-080-7163)<br>Space group:<br>15 : C12/c1,unique-b,cell-1 | a (Å)                                            |   | 5.017(3)  | 5.0604(16) | 5.053(3)   | 5.0588(8)  | 5.035(6)   | ---       |
|                                                                                                                             | b (Å)                                            |   | 8.717(5)  | 8.777(5)   | 8.782(6)   | 8.7354(13) | 8.790(2)   | ---       |
|                                                                                                                             | c (Å)                                            |   | 9.608(6)  | 9.760(4)   | 9.714(6)   | 9.7254(17) | 9.767(4)   | ---       |
|                                                                                                                             | α (Degree)                                       |   | 90        | 90         | 90         | 90         | 90         | ---       |
|                                                                                                                             | β (Degree)                                       |   | 99.74(5)  | 100.12(3)  | 99.45(7)   | 99.824(14) | 100.22(2)  | ---       |
|                                                                                                                             | γ (Degree)                                       |   | 90        | 90         | 90         | 90         | 90         | ---       |
|                                                                                                                             | V (Å <sup>3</sup> )                              |   | 414.1(4)  | 426.7(3)   | 425.2(5)   | 423.22(12) | 427.8(2)   | ---       |
|                                                                                                                             | Scale factor                                     |   | 40.3 (19) | 9.0(7)     | 12.4(8)    | 9.2(9)     | 7.0(6)     | ---       |
|                                                                                                                             | Gaussian peak width parameters (° <sup>2</sup> ) | U | 0.00(14)  | 0.17(3)    | 0.6(2)     | 0.092(11)  | 0.6(2)     | ---       |
|                                                                                                                             |                                                  | V | 0.24(4)   | -0.16(3)   | -0.26(8)   | -0.157(11) | -0.6(2)    | ---       |
|                                                                                                                             |                                                  | W | 0.00(3)   | 0.011(7)   | 0.06(2)    | 0.051(11)  | 0.08(3)    | ---       |
| Li <sub>0.54</sub> Ti <sub>2.86</sub> O <sub>6</sub><br>Lithium titanium oxide                                              | a (Å)                                            |   | N/A       | ---        | ---        | ---        | ---        | ---       |
|                                                                                                                             | b (Å)                                            |   | N/A       | ---        | ---        | ---        | ---        | ---       |
|                                                                                                                             | c (Å)                                            |   | N/A       | ---        | ---        | ---        | ---        | ---       |
|                                                                                                                             | α (Degree)                                       |   | N/A       | ---        | ---        | ---        | ---        | ---       |
|                                                                                                                             | β (Degree)                                       |   | N/A       | ---        | ---        | ---        | ---        | ---       |
|                                                                                                                             | γ (Degree)                                       |   | N/A       | ---        | ---        | ---        | ---        | ---       |
|                                                                                                                             | V (Å <sup>3</sup> )                              |   | N/A       | ---        | ---        | ---        | ---        | ---       |
|                                                                                                                             | Scale factor                                     |   | 0.99(8)   | ---        | ---        | ---        | ---        | ---       |
|                                                                                                                             | Gaussian peak width parameters (° <sup>2</sup> ) | U | 1.6(13)   | ---        | ---        | ---        | ---        | ---       |
|                                                                                                                             |                                                  | V | -1(4)     | ---        | ---        | ---        | ---        | ---       |
|                                                                                                                             |                                                  | W | 0.82(16)  | ---        | ---        | ---        | ---        | ---       |

\* Samples named with % and V were achieved by reaching a certain percentage (%) of theoretical charge at a cathodic potential (V) vs. Ni/NiO reference electrode.

## 2. Density Functional Theory (DFT) simulations

DFT simulations were used for the thermodynamics calculation including crystal structure and free energy calculations, which support the derivation of the  $\text{TiO}_2$  eletrolytic reduction mechanism.

### 2.1 Density Functional Theory

DFT calculations for the crystalline bulks were performed using the Vienna Ab Initio Simulation Package (VASP). [1] The total energies and structural relaxations were carried out using the projector augmented wave (PAW) method to treat core electrons.[2] The energy cutoff up to 520 eV was used for the plane wave basis set. The Perdew-Burke-Ernzerhof (PBE) functional was employed to account for the electron exchange-correlation effects. [3] Spin polarizations were considered in all calculations. A Monkhorst–Pack scheme was used to generate the k-point mesh for the Brillouin zone sampling.

### 2.2 Crystal models

The most stable phase for each involved bulk crystal (i.e.,  $\text{TiO}$ ,  $\text{TiO}_2$ ,  $\text{Ti}$ ,  $\text{Li}_2\text{TiO}_3$ ,  $\text{Li}_2\text{O}$ , and  $\text{LiTiO}_2$ ) were used. The unit cell structures are illustrated in Figure S1. PBE + U calculations were performed on all oxide and perovskite crystals containing the Ti species, and U-J is set to be 2.0 eV, which has been shown to produce more accurate reaction energies for the PBE+U methods. [4] The optimized bulk lattice structures based on periodic DFT calculations using the described modeling method were tabulated in Table S2.

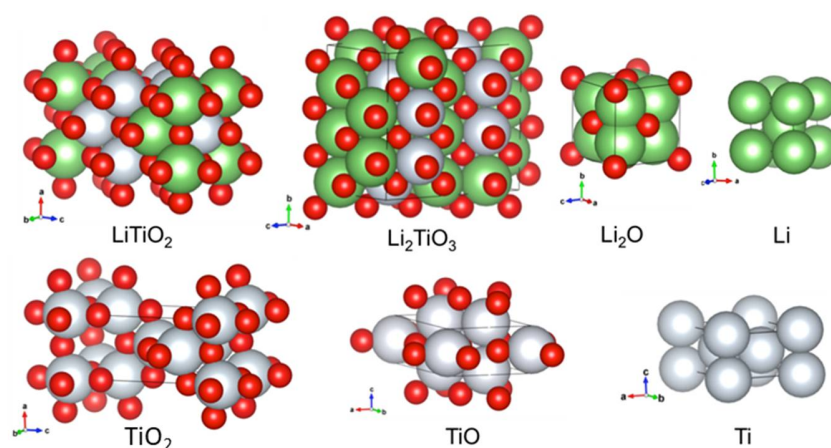

Figure S1. Optimized bulk crystal structures for the Li system,  $\text{TiO}_2$ ,  $\text{TiO}$ , and  $\text{Ti}$ .  $\text{Ti}$ ,  $\text{Li}$ , and  $\text{O}$  are in grey, green, and red, respectively. Black lines indicate the boundaries of the unit cell. Axis labels along the a, b, c directions are also shown.

Table S2. Optimized bulk lattice parameters.

| Crystals                         | Crystal lattice |                                                                                                                                |
|----------------------------------|-----------------|--------------------------------------------------------------------------------------------------------------------------------|
|                                  | Space group     | Lattice parameters                                                                                                             |
| LiTiO <sub>2</sub>               | 4/ <i>mmm</i>   | $a = b = 4.08 \text{ \AA}, c = 8.56 \text{ \AA}; \alpha = \beta = \gamma = 90^\circ$                                           |
| Li <sub>2</sub> TiO <sub>3</sub> | 2/ <i>m</i>     | $a = 5.11 \text{ \AA}, b = 8.88 \text{ \AA}, c = 9.83 \text{ \AA}; \alpha = 90^\circ, \beta = 100.24^\circ, \gamma = 90^\circ$ |
| TiO                              | $\bar{6}m2$     | $a = b = 5.06 \text{ \AA}, c = 2.92 \text{ \AA}; \alpha = \beta = 90^\circ, \gamma = 120^\circ$                                |
| TiO <sub>2</sub>                 | 4/ <i>mmm</i>   | $a = b = 3.84 \text{ \AA}, c = 9.74 \text{ \AA}; \alpha = \beta = \gamma = 90^\circ$                                           |
| Li <sub>2</sub> O                | $m\bar{3}m$     | $a = b = c = 4.63 \text{ \AA}; \alpha = \beta = \gamma = 90^\circ$                                                             |
| Ti                               | 6/ <i>mmm</i>   | $a = b = 4.58 \text{ \AA}, c = 2.83 \text{ \AA}; \alpha = \beta = 90^\circ, \gamma = 120^\circ$                                |
| Li                               | $m\bar{3}m$     | $a = b = c = 3.43 \text{ \AA}; \alpha = \beta = \gamma = 90^\circ$                                                             |

### 2.3 Free energy calculations

A quasiharmonic approach would be adopted to estimate the thermodynamics of solids at high temperatures. The Helmholtz free energy,  $F(V, T)$ , a function of both crystal volume ( $V$ ) and temperature ( $T$ ), could be expressed by Equation S1,

$$F(T, V) = E(V) + F_{vib}(V, T) + F_{el}(V, T), \quad (\text{S1})$$

where  $E(V)$  is the total energy.  $F_{vib}(V, T)$  and  $F_{el}(V, T)$  represent the vibrational and thermal electronic contributions to the free energy, respectively.

$E(V)$  of a given crystal can be described by the equation of state (EOS), and its values at different volumes were obtained directly from periodic DFT calculations. Here, the 4<sup>th</sup>-order Birch-Murnaghan (BM4) EOS was used. Specifically,  $E(V)$  is expressed as:

$$E(V) = a + bV^{-2/3} + cV^{-4/3} + dV^{-2}. \quad (\text{S2})$$

The EOS expressions for all materials considered for free energy calculations are listed in Table S3. Then, the bulk modulus ( $B(V)$ ) and pressure ( $P$ ), both in GPa, can be represented by Equations S3 and S4, respectively.

$$B(V) = V \frac{\partial^2 E}{\partial V^2}, \quad (\text{S3})$$

$$P = -\frac{\partial E}{\partial V}. \quad (\text{S4})$$

Values of  $B(V)$  at the equilibrium volume ( $V_0$ ) determined from respective BM4 EOS are also listed in Table S3. The vibrational free energy contribution,  $F_{vib}(T)$ , can be rigorously obtained from explicit phonon calculations. In this study, the calculation of  $F_{vib}(T)$  at the equilibrium volume ( $V_0$ ) follows the formulation of a simplified Debye model, as expressed in Equation S5,

$$F_{vib}(T) = \frac{9}{8}k_B\Theta_D + k_BT \left\{ 3\ln \left[ 1 - \exp\left(-\frac{\Theta_D}{T}\right) \right] - D\left(\frac{\Theta_D}{T}\right) \right\} \quad (\text{S5})$$

where  $\Theta_D$  is the Debye temperature;  $D(\Theta_D/T)$  is the Debye function, expressed by Equation S6,

$$D(x) = \frac{3}{x^3} \int_0^x \frac{t^3}{\exp(t)-1} dt. \quad (\text{S6})$$

The Debye temperature was approximated by the Debye-Wang model [5], as in Equation S7,

$$\Theta_D = sAV^{1/6} \left\{ \frac{1}{M} \left[ B(V) - \frac{2(\lambda+1)}{3}P \right] \right\}^{1/2}, \quad (\text{S7})$$

where  $s = 0.617$ ,  $A = 231.04$ , and  $\lambda = -0.5$ .  $M$  is the molecular weight in gram/mole. In this work, we assume that the effect related to crystal thermal expansion can be neglected. The values for  $B$  and  $P$  were taken at  $V_0$ , resulting in  $P(V_0) = 0$ . Then, the Debye temperature can be expressed as  $\Theta_D = sAV_0^{1/6}(B(V_0)/M)^{1/2}$ .

The electronic free energy contribution  $F_{el}(T)$  at  $V_0$  is represented by Equation S8

$$F_{el}(T) = E_{el}(T) + TS_{el}(T) \quad (\text{S8})$$

where  $E_{el}(T)$  and  $S_{el}(T)$  are the internal energy and entropy due to electronic excitation, and are given by Equations S9 and S10:

$$E_{el}(T) = \int n(\varepsilon)f\varepsilon d\varepsilon - \int^{\varepsilon_f} n(\varepsilon)\varepsilon d\varepsilon, \quad (\text{S9})$$

$$\text{and } S_{el}(T) = -k_B \int n(\varepsilon)[f\ln f + (1-f)\ln(1-f)]d\varepsilon, \quad (\text{S10})$$

where  $n(\varepsilon)$  represents the electronic density of states (DOS), and can be obtained from DFT calculations,  $f(\varepsilon, T)$  is the Fermi distribution function, as shown in Equation S11,

$$f(\varepsilon, T) = \frac{1}{\exp\left(\frac{\varepsilon-\mu}{k_BT}\right)+1}, \quad (\text{S11})$$

where  $k_B$  is the Boltzmann's constant,  $\varepsilon_f$  is the Fermi energy, and  $\mu$  is the electronic chemical potential, which ensures that the Fermi function produces the total number of electrons at  $T$ . Values of  $\mu$  corresponding to each material can be found in Table S3.

Table S3. Equation of state (Equation S2), equilibrium volumes ( $V_0$ ) determined from corresponding BM4 EOS, bulk moduli, and electronic potentials for the materials modeled from DFT.

| Crystal                          | BM4 EOS                                                                    | $V_0$ ( $\text{\AA}^3$ ) | $B(V_0)$ (GPa) | $\mu$ (eV) |
|----------------------------------|----------------------------------------------------------------------------|--------------------------|----------------|------------|
| LiTiO <sub>2</sub>               | $a = -571.9, b = 41551.2$<br>$c = -1.25 \times 10^6, d = 1.24 \times 10^7$ | 143.8                    | 139.7          | 7.07       |
| Li <sub>2</sub> TiO <sub>3</sub> | $a = -79.3, b = -23671$<br>$c = 249893, d = 1.68 \times 10^7$              | 440.9                    | 107.8          | 2.55       |
| TiO                              | $a = 177.5, b = -9384.75$<br>$c = 126016, d = -540527$                     | 65                       | 215.3          | 8.35       |
| TiO <sub>2</sub>                 | $a = 35.8, b = -6282$<br>$c = 35014.2, d = 935552$                         | 143.7                    | 180.6          | 1.88       |
| Li <sub>2</sub> O                | $a = -1.42, b = -2395.5$<br>$c = 25495.8, d = 2929.43$                     | 99.4                     | 80.5           | 1.386      |
| Ti                               | $a = 26.4, b = -1503.21$<br>$c = 12977.2, d = -23850.9$                    | 51.4                     | 113            | 5.9        |
| Li                               | $a = 1.65, b = -147.2$<br>$c = 1191, d = -2524.4$                          | 40.7                     | 13.8           | 0.56       |

## References

1. Kresse, G.; Hafner, J. Ab Initio Molecular Dynamics for Liquid Metals. *Phys. Rev. B* **1993**, *47*, 558–561, doi:10.1103/PhysRevB.47.558.
2. Kresse, G.; Joubert, D. From Ultrasoft Pseudopotentials to the Projector Augmented-Wave Method. *Phys. Rev. B* **1999**, *59*, 1758–1775, doi:10.1103/PhysRevB.59.1758.
3. Perdew, J.P.; Burke, K.; Ernzerhof, M. Generalized Gradient Approximation Made Simple. *Phys. Rev. Lett.* **1996**, *77*, 3865–3868, doi:10.1103/PhysRevLett.77.3865.
4. Hu, Z.; Metiu, H. Choice of U for DFT+U Calculations for Titanium Oxides. *J. Phys. Chem. C* **2011**, *115*, 5841–5845, doi:10.1021/jp111350u.
5. Wang, Y.; Ahuja, R.; Johansson, B. Mean-Field Potential Approach to the Quasiharmonic Theory of Solids. *Int. J. Quantum Chem.* **2004**, *96*, 501–506, doi:10.1002/qua.10769.
